# Supplementary material
Source: HighWire-hosted journal article supplement (https://heart.bmj.com/content/110/2/94)
Supplement: inline-supplementary-material-1 [file inline-supplementary-material-1.pdf]

## Supplemental Material

### *Factors influencing blood pressure control in patients with atrial fibrillation and hypertension in Australian primary care*

**Table S1. Antihypertensive drug classes grouped by active ingredients**

| Anti-hypertensive drug class   | Active Ingredients                                                                               |
|--------------------------------|--------------------------------------------------------------------------------------------------|
| ACE inhibitors                 | Captopril; Enalapril; Fosinopril; Lisinopril; Perindopril; Quinapril; Ramipril; Trandolapril     |
| Angiotensin Receptor Blockers  | Candesartan; Eprosartan; Irbesartan; Losartan; Olmesartan; Telmisartan; Valsartan                |
| Beta-blockers                  | Atenolol; Bisoprolol; Carvedilol; Labetalol; Metoprolol; Nebivolol                               |
| Calcium channel blockers       | Amlodipine; Clevidipine; Diltiazem; Felodipine; Lercanidipine; Nifedipine; Nimodipine; Verapamil |
| Thiazide and related diuretics | Chlortalidone; Hydrochlorothiazide; Indapamide                                                   |
| Other diuretics                | Amiloride; Spironolactone                                                                        |
| Other antihypertensives        | Diazoxide; Hydralazine; Methyldopa; Minoxidil; Moxonidine; Prazosin                              |

**Table S2. Conditions grouped by body systems categories for multimorbidity calculation**

| Body system categories                          | Conditions                                                                                                        | Dataset condition flags                                                                                                                                                                                                                                                                                                                    |
|-------------------------------------------------|-------------------------------------------------------------------------------------------------------------------|--------------------------------------------------------------------------------------------------------------------------------------------------------------------------------------------------------------------------------------------------------------------------------------------------------------------------------------------|
| <b>Cardiovascular diseases and risk factors</b> | Atrial fibrillation/flutter                                                                                       | Atrial fibrillation (f_AF); Atrial flutter (f_AFL)                                                                                                                                                                                                                                                                                         |
|                                                 | Atherosclerotic disease<br>(same as 'Vascular Disease' component of CHA <sub>2</sub> DS <sub>2</sub> -VAsc score) | Carotid Artery Stenosis (f_CASTEN); Carotid Artery Stenosis Related Procedure (f_CASTEN_PR); Coronary Heart Disease and Atherosclerosis (f_CHD_ATH); Coronary Heart Disease Related Procedure (f_CHD_ATH_PR); Peripheral Vascular Disease (f_PVD); Renal Artery Stenosis (f_RASTEN); Renal Artery Stenosis Related Procedure (f_RASTEN_PR) |
|                                                 | Heart failure                                                                                                     | Heart failure (f_HF)                                                                                                                                                                                                                                                                                                                       |
|                                                 | Rheumatic heart disease                                                                                           | Rheumatic heart disease (f_RHEUHEAR)                                                                                                                                                                                                                                                                                                       |
|                                                 | Stroke                                                                                                            | Stroke All (f_str_all); Haemorrhagic (f_STR_H); Ischaemic (f_STR_I); Lacunar (f_STR_L); Migrainous (f_STR_M); Thrombotic (f_STR_T); Unspecified (f_STR_US); Transient Ischaemic Attack (f_TIA)                                                                                                                                             |
|                                                 | Dyslipidaemia                                                                                                     | Dyslipidaemia (f_DYS); Hypercholesterolaemia (f_HYPERC); Hyperlipidaemia (f_HYPERLI); Hypertriglyceridemia (f_HYPERTRIG)                                                                                                                                                                                                                   |
|                                                 | Hypertension                                                                                                      | Hypertension (f_HYPT)                                                                                                                                                                                                                                                                                                                      |
|                                                 | <b>Endocrine diseases</b>                                                                                         | Diabetes                                                                                                                                                                                                                                                                                                                                   |
| Polycystic ovarian syndrome                     |                                                                                                                   | Polycystic ovarian syndrome (f_PCOS)                                                                                                                                                                                                                                                                                                       |
| Thyroid disorders                               |                                                                                                                   | Hyperthyroidism (f_THYROID_HYPER); Hypothyroidism (f_THYROID_HYPO); Thyroid Disorder Unspecified (f_THYROID_UNSPEC)                                                                                                                                                                                                                        |
| <b>Chronic kidney disease</b>                   | Chronic kidney disease                                                                                            | Chronic Kidney Disease - Stage 1 (f_CKD_1); Chronic Kidney Disease - Stage 2 (f_CKD_2); Chronic Kidney Disease - Stage 3 (f_CKD_3); Chronic Kidney Disease - Stage 4 (f_CKD_4); Chronic Kidney Disease - Stage 5 (f_CKD_5); Chronic Kidney Disease - Unspecified (f_CKD_UNSP)                                                              |
| <b>Cancer</b>                                   | Cancer                                                                                                            | Cancer (f_CANC)                                                                                                                                                                                                                                                                                                                            |
| <b>Musculoskeletal diseases</b>                 | Arthritis                                                                                                         | Arthritis (f_ARTH)                                                                                                                                                                                                                                                                                                                         |
|                                                 | Chronic pain                                                                                                      | Chronic Pain (f_PAIN_CHR); Lower Back Pain (f_PAIN_BACK_L)                                                                                                                                                                                                                                                                                 |
|                                                 | Osteoarthritis                                                                                                    | Osteoarthritis (f_OSTEO)                                                                                                                                                                                                                                                                                                                   |
|                                                 | Osteoporosis                                                                                                      | Osteoporosis (f_OP)                                                                                                                                                                                                                                                                                                                        |
|                                                 | Rheumatoid arthritis                                                                                              | Rheumatoid Arthritis (f_ARTH_RH); Juvenile Rheumatoid Arthritis (f_ARTH_JRA)                                                                                                                                                                                                                                                               |

|                                           |                        |                                                |
|-------------------------------------------|------------------------|------------------------------------------------|
| <b>Mental and neurological conditions</b> | Anxiety and depression | Anxiety (f_ANX); Depression (f_DEPR)           |
|                                           | Bipolar                | Bipolar Disorder (f_BIPOL)                     |
|                                           | Dementia               | Dementia (f_DEMEN)                             |
|                                           | Epilepsy               | Epilepsy (f_EPIL)                              |
|                                           | Schizophrenia          | Schizophrenia (f_SCHIZ)                        |
|                                           | Substance abuse        | Substance Abuse (f_ABU_SUB)                    |
| <b>Lung diseases</b>                      | Asthma                 | Asthma (f_ASTH)                                |
|                                           | COPD                   | Chronic Obstructive Pulmonary Disease (f_COPD) |
| <b>Gastro-intestinal diseases</b>         | Chronic Liver Disease  | Chronic Liver Disease (f_CLD)                  |
|                                           | Coeliac Disease        | Coeliac Disease (f_COELIAC)                    |
|                                           | Crohn's Disease        | Crohn's Disease (f_CROHNS)                     |
|                                           | Ulcerative Colitis     | Ulcerative Colitis (f_COLI_ULC)                |

**Table S3. Characteristics of 34, 815 AF patients with hypertension grouped by achievement of blood pressure control (controlled BP defined as <140/90 mmHg)**

|                                        | <b>Controlled BP</b>         | <b>Uncontrolled BP</b>       | <b>Total</b>       |
|----------------------------------------|------------------------------|------------------------------|--------------------|
|                                        | <b>N = 21,583</b><br>(62.0%) | <b>N = 13,232</b><br>(38.0%) | <b>N = 34,815</b>  |
| <b>Age Mean (SD)</b>                   | 76.8 (±10.0)                 | 77.1 (±10.5)                 | 76.9 (±10.2)       |
| <b>Age Median (IQR)</b>                | 78.0 (71.0 - 84.0)           | 78.0 (71.0 - 85.0)           | 78.0 (71.0 - 84.0) |
| < 65 years old                         | 2,440 (11.3%)                | 1,585 (12.0%)                | 4,025 (11.6%)      |
| 65-74 years old                        | 5,811 (26.9%)                | 3,206 (24.2%)                | 9,017 (25.9%)      |
| ≥ 75 years old                         | 13,332 (61.8%)               | 8,441 (63.8%)                | 21,773 (62.5%)     |
| <b>Sex</b>                             | <b>N=21,580</b>              | <b>N=13,229</b>              | <b>N=34,809</b>    |
| Male                                   | 12,181 (56.4%)               | 6,558 (49.6%)                | 18,739 (53.8%)     |
| Female                                 | 9,399 (43.6%)                | 6,671 (50.4%)                | 16,070 (46.2%)     |
| <b>Indigenous Status</b>               | <b>N=19,406</b>              | <b>N=11,627</b>              | <b>N=30,763</b>    |
| Aboriginal/Torres Strait Islander      | 405 (2.1%)                   | 166 (1.4%)                   | 571 (1.9%)         |
| Non- Aboriginal/Torres Strait Islander | 18,731 (97.9%)               | 11,461 (98.6%)               | 30,192 (98.1%)     |
| <b>Remoteness Area</b>                 | <b>N=21,510</b>              | <b>N=13,202</b>              | <b>N=34,712</b>    |
| Major Cities of Australia              | 6,435 (29.9%)                | 4,073 (30.9%)                | 10,508 (30.3%)     |
| Inner Regional Australia               | 11,904 (55.3%)               | 7,175 (54.3%)                | 19,079 (55.0%)     |
| Outer Regional Australia               | 2,840 (13.2%)                | 1,736 (13.1%)                | 4,576 (13.2%)      |
| Remote Australia                       | 224 (1.0%)                   | 136 (1.0%)                   | 360 (1.0%)         |
| Very Remote Australia                  | 107 (0.5%)                   | 82 (0.6%)                    | 189 (0.5%)         |
| <b>Australian State/Territories</b>    |                              |                              |                    |
| New South Wales                        | 9,226 (42.7%)                | 5,438 (41.1%)                | 14,664 (42.1%)     |
| Victoria                               | 3,811 (17.7%)                | 2,332 (17.6%)                | 6,143 (17.6%)      |
| Queensland                             | 3,668 (17.0%)                | 2,073 (15.7%)                | 5,741 (16.5%)      |
| South Australia                        | 494 (2.3%)                   | 389 (2.9%)                   | 883 (2.5%)         |
| Western Australia                      | 2,000 (9.3%)                 | 1,332 (10.1%)                | 3,332 (9.6%)       |
| Tasmania                               | 1,595 (7.4%)                 | 1,231 (9.3%)                 | 2,826 (8.1%)       |
| Northern Territory                     | 229 (1.1%)                   | 78 (0.6%)                    | 307 (0.9%)         |
| Australian Capital Territory           | 560 (2.6%)                   | 359 (2.7%)                   | 919 (2.6%)         |
| <b>Social Economic Status (IRSAD)</b>  | <b>N=21,511</b>              | <b>N=13,202</b>              | <b>N=34,713</b>    |
| 1 = most disadvantaged                 | 4,767 (22.2%)                | 2,705 (20.5%)                | 7,472 (21.5%)      |
| 2                                      | 4,459 (20.7%)                | 2,914 (22.1%)                | 7,373 (21.2%)      |
| 3                                      | 4,823 (22.4%)                | 2,854 (21.6%)                | 7,677 (22.1%)      |
| 4                                      | 3,244 (15.1%)                | 2,066 (15.6%)                | 5,310 (15.3%)      |
| 5 = most advantaged                    | 4,218 (19.6%)                | 2,663 (20.2%)                | 6,881 (19.8%)      |
| <b>Education and Occupation (IEO)</b>  | <b>N=21,511</b>              | <b>N=13,202</b>              | <b>N=34,713</b>    |
| 1 = low education                      | 5,080 (23.6%)                | 2,869 (21.7%)                | 7,949 (22.9%)      |
| 2                                      | 5,183 (24.1%)                | 3,313 (25.1%)                | 8,496 (24.5%)      |
| 3                                      | 3,845 (17.9%)                | 2,278 (17.3%)                | 6,123 (17.6%)      |
| 4                                      | 3,507 (16.3%)                | 2,126 (16.1%)                | 5,633 (16.2%)      |
| 5 = high education                     | 3,896 (18.1%)                | 2,616 (19.8%)                | 6,512 (18.8%)      |
| <b>Blood Pressure</b>                  |                              |                              |                    |

|                                                    |                       |                     |                     |
|----------------------------------------------------|-----------------------|---------------------|---------------------|
| Systolic Mean (SD)                                 | 127.6 (±8.8)          | 149.1 (±9.4)        | 135.8 (±13.8)       |
| Systolic Median (IQR)                              | 129.2 (122.4 - 134.5) | 147.0 (142.7-153.3) | 135.4 (126.7-144.1) |
| Diastolic Mean (SD)                                | 73.9 (±7.5)           | 80.3 (±9.9)         | 76.3 (±9.1)         |
| Diastolic Median (IQR)                             | 74.3 (69.0 - 79.5)    | 80.1 (73.7 - 86.9)  | 76.2 (70.3 - 82.0)  |
| <b>Body Mass Index (BMI)</b>                       | N=19,216              | N=11,649            | N=30,865            |
| Mean (SD)                                          | 30.5 (±8.8)           | 29.9 (±8.0)         | 30.3 (±8.5)         |
| Median (IQR)                                       | 29.3 (25.8 - 33.8)    | 28.9 (25.4 - 33.1)  | 29.1 (25.6 - 33.5)  |
| Healthy                                            | 214 (1.1%)            | 160 (1.4%)          | 374 (1.2%)          |
| Underweight                                        | 3,693 (19.2%)         | 2,445 (21.0%)       | 6,138 (19.9%)       |
| Overweight                                         | 6,534 (34.0%)         | 4,138 (35.5%)       | 10,672 (34.6%)      |
| Obese                                              | 8,775 (45.7%)         | 4,906 (42.1%)       | 13,681 (44.3%)      |
| <b>Smoking Status</b>                              | N=20,848              | N=12,724            | N=33,572            |
| Non-smoker                                         | 11,031 (52.9%)        | 7,363 (57.9%)       | 18,394 (54.8%)      |
| Smoker                                             | 9,817 (47.1%)         | 5,361 (42.1%)       | 15,178 (45.2%)      |
| <b>CHA2DS2-VASc Mean (SD)</b>                      | 4.2 (±1.6)            | 4.0 (±1.6)          | 4.1 (±1.6)          |
| Score ≥ 3                                          | 18,372 (85.1%)        | 11,012 (83.2%)      | 29,384 (84.4%)      |
| <b>CHA2DS2-VASc components</b>                     |                       |                     |                     |
| Heart Failure                                      | 5,901 (27.3%)         | 2,441 (18.4%)       | 8,342 (24.0%)       |
| Hypertension                                       | 21,583 (100.0%)       | 13,232 (100.0%)     | 34,815 (100.0%)     |
| Stroke                                             | 4,647 (21.5%)         | 2,571 (19.4%)       | 7,218 (20.7%)       |
| Vascular Disease <sup>a</sup>                      | 7,847 (36.4%)         | 4,241 (32.1%)       | 12,088 (34.7%)      |
| Diabetes type 2                                    | 3,239 (15.0%)         | 1,587 (12.0%)       | 4,826 (13.9%)       |
| <b>Multimorbidity by body systems <sup>b</sup></b> |                       |                     |                     |
| CVD & Risk Factors                                 | 21,583 (100.0%)       | 13,232 (100.0%)     | 34,815 (100.0%)     |
| Endocrine Disease                                  | 8,681 (40.2%)         | 4,697 (35.5%)       | 13,378 (38.4%)      |
| Chronic Kidney Disease                             | 2,717 (12.6%)         | 1,525 (11.5%)       | 4,242 (12.2%)       |
| Cancer                                             | 10,047 (46.6%)        | 5,943 (44.9%)       | 15,990 (45.9%)      |
| Musculoskeletal Diseases                           | 17,444 (80.8%)        | 10,413 (78.7%)      | 27,857 (80.0%)      |
| Neurological Diseases                              | 8,420 (39.0%)         | 4,809 (36.3%)       | 13,229 (38.0%)      |
| Lung Diseases                                      | 6,808 (31.5%)         | 3,616 (27.3%)       | 10,424 (29.9%)      |
| Gastrointestinal Diseases                          | 550 (2.5%)            | 286 (2.2%)          | 836 (2.4%)          |
| Body systems sum Mean (SD)                         | 3.5 (±1.3)            | 3.4 (±1.2)          | 3.5 (±1.3)          |
| Multimorbidity ≥ 3 body systems                    | 17,017 (78.8%)        | 9,875 (74.6%)       | 26,892 (77.2%)      |
| <b>Antihypertensives</b>                           | 20,579 (97.5%)        | 12,599 (98.1%)      | 33,178 (97.7%)      |
| ACE inhibitors                                     | 8,183 (38.8%)         | 5,126 (39.9%)       | 13,309 (39.2%)      |
| Angiotensin Receptor Blockers                      | 10,299 (48.8%)        | 7,123 (55.4%)       | 17,422 (51.3%)      |
| Beta-blockers                                      | 13,314 (63.1%)        | 7,154 (55.7%)       | 20,468 (60.3%)      |
| Calcium channel blockers                           | 8,635 (40.9%)         | 7,000 (54.5%)       | 15,635 (46.1%)      |
| Thiazide and related diuretics                     | 4,951 (23.5%)         | 4,232 (32.9%)       | 9,183 (27.1%)       |
| Other diuretics                                    | 3,835 (18.2%)         | 1,384 (10.8%)       | 5,219 (15.4%)       |
| Other antihypertensives                            | 1,621 (7.7%)          | 1,868 (14.5%)       | 3,489 (10.3%)       |
| Mean (SD)                                          | 2.4 (±1.2)            | 2.6 (±1.3)          | 2.5 (±1.2)          |
| ≥ 2 antihypertensive medications                   | 16,419 (77.8%)        | 10,444 (81.3%)      | 26,863 (79.1%)      |
| Missing                                            | 486                   | 386                 | 872                 |

| <b>GP visits</b>          | <b>N = 21,582</b>  | <b>N = 13,231</b>  | <b>N = 34,814</b>  |
|---------------------------|--------------------|--------------------|--------------------|
| Mean (SD)                 | 33.3 ( $\pm$ 22.2) | 29.8 ( $\pm$ 20.4) | 32.0 ( $\pm$ 21.6) |
| Median (Q1, Q3)           | 29.0 (18.0 - 43.0) | 25.0 (15.0 - 39.0) | 27.0 (17.0 - 42.0) |
| Q1 (1-17)                 | 5,091 (23.6%)      | 4,024 (30.4%)      | 9,115 (26.2%)      |
| Q2 (18-27)                | 5,053 (23.4%)      | 3,265 (24.7%)      | 8,318 (23.9%)      |
| Q3 (28-42)                | 5,800 (26.9%)      | 3,186 (24.1%)      | 8,986 (25.8%)      |
| Q4 (43+)                  | 5,638 (26.1%)      | 2,757 (20.8%)      | 8,395 (24.1%)      |
| <b>Regularity</b>         | <b>N = 21,410</b>  | <b>N = 13,070</b>  | <b>N = 34,480</b>  |
| Mean (SD)                 | 0.5 ( $\pm$ 0.1)   | 0.5 ( $\pm$ 0.1)   | 0.5 ( $\pm$ 0.1)   |
| Median (Q1, Q3)           | 0.5 (0.4 - 0.5)    | 0.5 (0.4 - 0.5)    | 0.5 (0.4 - 0.5)    |
| Q1 (0-0.45)               | 7,084 (33.1%)      | 4,176 (32.0%)      | 11,260 (32.7%)     |
| Q2 (0.46-0.49)            | 5,210 (24.3%)      | 3,094 (23.7%)      | 8,304 (24.1%)      |
| Q3 (0.50-0.53)            | 4,580 (21.4%)      | 2,836 (21.7%)      | 7,416 (21.5%)      |
| Q4 (0.54+)                | 4,536 (21.2%)      | 2,964 (22.7%)      | 7,500 (21.8%)      |
| <b>Continuity of Care</b> | <b>N = 21,582</b>  | <b>N = 13,231</b>  | <b>N = 34,814</b>  |
| Mean (SD)                 | 0.5 ( $\pm$ 0.2)   | 0.4 ( $\pm$ 0.2)   | 0.4 ( $\pm$ 0.2)   |
| Median (Q1, Q3)           | 0.4 (0.3 - 0.6)    | 0.4 (0.3 - 0.6)    | 0.4 (0.3 - 0.6)    |
| Q1 (0-0.27)               | 5,595 (25.9%)      | 3,810 (28.8%)      | 9,405 (27.0%)      |
| Q2 (0.28-0.41)            | 5,223 (24.2%)      | 3,209 (24.3%)      | 8,432 (24.2%)      |
| Q3 (0.42-0.61)            | 5,559 (25.8%)      | 3,421 (25.9%)      | 8,980 (25.8%)      |
| Q4 (0.62+)                | 5,205 (24.1%)      | 2,792 (21.1%)      | 7,997 (23.0%)      |

SD = Standard Deviation; IQR = Interquartile Range; IRSAD = Index of Relative Socio-Economic Advantage and Disadvantage; CHA<sub>2</sub>DS<sub>2</sub>-VASC = Congestive heart failure, Hypertension, Age  $\geq$ 75 years [double weight], Diabetes, previous Stroke [double weight], Vascular disease, Age 65–74 years, female Sex category score; ACE Inhibitors = Angiotensin-converting-enzyme Inhibitors; GP = General Practice; Q1–4 = quartiles. Controlled blood pressure was defined as  $<$ 140/90 mmHg(1).

<sup>a</sup> Multimorbidity classes – Cardiovascular Diseases & Risk Factors (Atrial fibrillation/flutter, Atherosclerotic disease, Heart failure, Rheumatic heart disease, Stroke, Dyslipidaemia, Hypertension); Endocrine diseases (Diabetes, Polycystic ovarian syndrome, Thyroid disorders); Chronic kidney disease; Cancer; Musculoskeletal diseases (Arthritis, Chronic pain, Osteoarthritis, Osteoporosis, Rheumatoid arthritis); Mental and neurological conditions (Anxiety, depression, Bipolar, Dementia, Epilepsy, Schizophrenia, Substance abuse); Lung diseases (Asthma, Chronic obstructive pulmonary disease); Gastro-intestinal diseases (Chronic Liver Disease, Coeliac Disease, Crohn's Disease). <sup>b</sup> Vascular disease – Carotid Artery Stenosis, Coronary Heart Disease and Atherosclerosis, Peripheral Vascular Disease and Renal Artery Stenosis.

GP visits – total number of GP visits (any professional interchange between a patient and a general practitioner/practice nurse, these excluded any non-clinical/ administrative encounters) within the observation period. Regularity – consistency of each patients' GP visits within the observation period (i.e. index assessing whether visits are on a regular basis)(2). Continuity of Care – measuring whether patients see the same clinician – values range from 0 (i.e., all visits to different clinicians = low CoC) to 1 (i.e., all visits to the same clinician = high CoC)(3)

**Table S4. Factors influencing controlled blood pressure in AF patients with hypertension using multivariable logistic regression model (random effects for GP clinic, reference levels are indicated in brackets).**

|                                                | Odds Ratio | OR 95% CI Lower | OR 95% CI Upper | p-value |
|------------------------------------------------|------------|-----------------|-----------------|---------|
| <b>Sex (Male)</b>                              |            |                 |                 |         |
| Female                                         | 0.72       | 0.68            | 0.76            | <0.001  |
| <b>Age groups (&lt;65)</b>                     |            |                 |                 |         |
| 65-74                                          | 0.96       | 0.86            | 1.07            | 0.427   |
| ≥75                                            | 0.78       | 0.7             | 0.86            | <0.001  |
| <b>Body Mass Index (Healthy)</b>               |            |                 |                 |         |
| Underweight                                    | 0.91       | 0.72            | 1.15            | 0.434   |
| Overweight                                     | 1.01       | 0.94            | 1.08            | 0.888   |
| Obese                                          | 1.12       | 1.04            | 1.2             | 0.002   |
| <b>Smoking status (Non-smoker)</b>             |            |                 |                 |         |
| Smoker                                         | 1.11       | 1.05            | 1.17            | <0.001  |
| <b>Indigenous status (Non-Indigenous)</b>      |            |                 |                 |         |
| Aboriginal/Torres Strait Islander              | 1.44       | 1.18            | 1.76            | <0.001  |
| <b>Social Economic Status (IRSAD = 1)</b>      |            |                 |                 |         |
| 2                                              | 0.92       | 0.83            | 1.02            | 0.129   |
| 3                                              | 0.99       | 0.87            | 1.13            | 0.938   |
| 4                                              | 0.94       | 0.8             | 1.11            | 0.481   |
| 5 = most advantaged                            | 1.19       | 0.97            | 1.45            | 0.097   |
| <b>Index of Education &amp; Occupation (1)</b> |            |                 |                 |         |
| 2                                              | 0.92       | 0.83            | 1.02            | 0.117   |
| 3                                              | 0.92       | 0.81            | 1.05            | 0.219   |
| 4                                              | 0.86       | 0.74            | 1.01            | 0.06    |
| 5 = high education                             | 0.69       | 0.57            | 0.84            | <0.001  |
| <b>CHA2DS2-VASc Score</b>                      |            |                 |                 |         |
| score ≥3                                       | 1.48       | 1.26            | 1.73            | <0.001  |
| <b>Multimorbidity</b>                          |            |                 |                 |         |
| ≥ 3 body systems affected                      | 1.14       | 1.07            | 1.21            | <0.001  |
| <b>GP visits (0-17)</b>                        |            |                 |                 |         |
| 18-27                                          | 1.24       | 1.15            | 1.34            | <0.001  |
| 28-42                                          | 1.5        | 1.39            | 1.62            | <0.001  |
| 43+                                            | 1.71       | 1.58            | 1.85            | <0.001  |
| <b>Regularity (0-0.45)</b>                     |            |                 |                 |         |
| 0.46-0.49                                      | 0.98       | 0.91            | 1.05            | 0.508   |
| 0.50-0.53                                      | 0.93       | 0.87            | 1               | 0.04    |
| 0.54+                                          | 0.91       | 0.84            | 0.97            | 0.006   |
| <b>Continuity of Care (0-0.27)</b>             |            |                 |                 |         |
| 0.28-0.41                                      | 1.1        | 1.03            | 1.18            | 0.007   |
| 0.42-0.61                                      | 1.09       | 1.02            | 1.17            | 0.014   |
| 0.62+                                          | 1.29       | 1.2             | 1.4             | <0.001  |

IRSAD = index of Relative Socio-Economic Advantage and Disadvantage; CHA<sub>2</sub>DS<sub>2</sub>-VAsc = Congestive heart failure, Hypertension, Age  $\geq$ 75 years [double weight], Diabetes, previous Stroke [double weight], Vascular disease, Age 65–74 years, female Sex category score; GP = General Practice.

**Table S5. Factors influencing treatment with  $\geq$ 2 antihypertensive medications for AF patients with hypertension using multivariable logistic regression model (random effects for GP clinic, reference levels are indicated in brackets).**

|                                                 | Odds Ratio | OR 95% CI<br>Lower | OR 95% CI<br>Upper | p-value |
|-------------------------------------------------|------------|--------------------|--------------------|---------|
| <b>Blood Pressure</b>                           |            |                    |                    |         |
| Systolic                                        | 1.01       | 1.01               | 1.02               | <0.001  |
| Diastolic                                       | 0.99       | 0.98               | 0.99               | <0.001  |
| <b>Sex (Male)</b>                               |            |                    |                    |         |
| Female                                          | 0.96       | 0.9                | 1.02               | 0.206   |
| <b>Age groups (&lt;65)</b>                      |            |                    |                    |         |
| 65-74                                           | 1.1        | 0.97               | 1.25               | 0.149   |
| $\geq$ 75                                       | 0.99       | 0.87               | 1.13               | 0.914   |
| <b>Body Mass Index (Healthy)</b>                |            |                    |                    |         |
| Underweight                                     | 1.04       | 0.79               | 1.37               | 0.756   |
| Overweight                                      | 1.29       | 1.19               | 1.4                | <0.001  |
| Obese                                           | 1.83       | 1.69               | 1.99               | <0.001  |
| <b>Smoking status (Non-smoker)</b>              |            |                    |                    |         |
| Smoker                                          | 0.99       | 0.93               | 1.05               | 0.675   |
| <b>Indigenous status (Non-Indigenous)</b>       |            |                    |                    |         |
| Aboriginal/Torres Strait Islander               | 1.08       | 0.86               | 1.36               | 0.514   |
| <b>Social Economic Status (IRSAD=1)</b>         |            |                    |                    |         |
| 2                                               | 0.9        | 0.79               | 1.02               | 0.106   |
| 3                                               | 0.97       | 0.83               | 1.14               | 0.732   |
| 4                                               | 0.95       | 0.78               | 1.15               | 0.61    |
| 5 = most advantaged                             | 0.9        | 0.71               | 1.13               | 0.353   |
| <b>Index of Education and Occupation (1)</b>    |            |                    |                    |         |
| 2                                               | 1.13       | 1                  | 1.28               | 0.056   |
| 3                                               | 1.05       | 0.9                | 1.23               | 0.507   |
| 4                                               | 0.99       | 0.82               | 1.19               | 0.912   |
| 5 = high education                              | 0.9        | 0.72               | 1.13               | 0.356   |
| <b>CHA<sub>2</sub>DS<sub>2</sub>-VAsc Score</b> |            |                    |                    |         |
| score $\geq$ 3                                  | 1.35       | 1.12               | 1.62               | 0.001   |
| <b>Multimorbidity</b>                           |            |                    |                    |         |
| $\geq$ 3 body systems                           | 0.97       | 0.9                | 1.05               | 0.517   |
| <b>GP visits (0-17)</b>                         |            |                    |                    |         |
| 18-27                                           | 1.27       | 1.16               | 1.38               | <0.001  |
| 28-42                                           | 1.59       | 1.45               | 1.74               | <0.001  |
| 43+                                             | 1.8        | 1.63               | 1.98               | <0.001  |
| <b>Regularity (0-0.45)</b>                      |            |                    |                    |         |



|                                                                                                                                                                                                                                                                                                                      |      |      |      |        |
|----------------------------------------------------------------------------------------------------------------------------------------------------------------------------------------------------------------------------------------------------------------------------------------------------------------------|------|------|------|--------|
| 0.46-0.49                                                                                                                                                                                                                                                                                                            | 1    | 0.92 | 1.09 | 0.992  |
| 0.50-0.53                                                                                                                                                                                                                                                                                                            | 1.04 | 0.96 | 1.14 | 0.342  |
| 0.54+                                                                                                                                                                                                                                                                                                                | 0.96 | 0.88 | 1.05 | 0.362  |
| <b>Continuity of Care (0-0.27)</b>                                                                                                                                                                                                                                                                                   |      |      |      |        |
| 0.28-0.41                                                                                                                                                                                                                                                                                                            | 1.09 | 1    | 1.19 | 0.038  |
| 0.42-0.61                                                                                                                                                                                                                                                                                                            | 1.19 | 1.1  | 1.3  | <0.001 |
| 0.62+                                                                                                                                                                                                                                                                                                                | 1.12 | 1.03 | 1.23 | 0.011  |
| IRSAD = index of Relative Socio-Economic Advantage and Disadvantage; CHA <sub>2</sub> DS <sub>2</sub> -VASc = Congestive heart failure, Hypertension, Age ≥75 years [double weight], Diabetes, previous Stroke [double weight], Vascular disease, Age 65–74 years, female Sex category score; GP = General Practice. |      |      |      |        |

## References

1. Gabb GM, Mangoni AA, Anderson CS, Cowley D, Dowden JS, Golledge J, et al. Guideline for the diagnosis and management of hypertension in adults—2016. *Medical Journal of Australia*. 2016;205(2):85-9.
2. Youens D, Doust J, Robinson S, Moorin R. Regularity and continuity of GP contacts and use of statins amongst people at risk of cardiovascular events. *Journal of General Internal Medicine*. 2021;36(6):1656-65.
3. Pollack CE, Hussey PS, Rudin RS, Fox DS, Lai J, Schneider EC. Measuring care continuity: a comparison of claims-based methods. *Medical care*. 2016;54(5):e30.
